# Supplementary material for: Metabolic response induced by parasitic plant-fungus interactions hinder amino sugar and nucleotide sugar metabolism in the host
Source: PubMed Central journal article supplement (PMC5124995; doi:10.1038/srep37434), 2016-11-28
Supplement: srep37434-s1.pdf [file srep37434-s1.pdf]

## **Supplementary information**

### **Metabolic response induced by parasitic plant-fungus interactions hinder amino sugar and nucleotide sugar metabolism in the host**

Dong-Kyu Lee, Soohyun Ahn, Hae Yoon Cho, Hye Young Yun, Jeong Hill Park, Johan Lim, Jeongmi Lee,  
Sung Won Kwon

**Supplementary Figure S1.** Leaf samples of *Crataegus pinnatifida* (control, a; parasitized, b), *Chaenomeles sinensis* (control, c; parasitized, d) and *Pyrus pyrifolia* (control, e; parasitized, f).

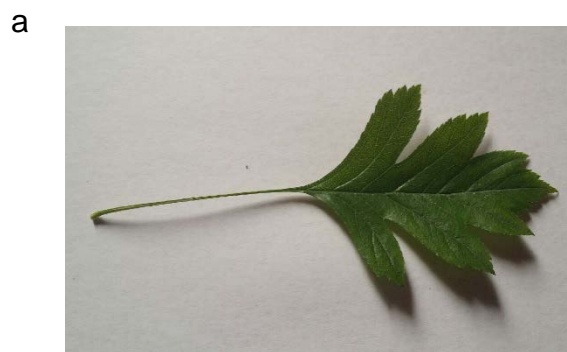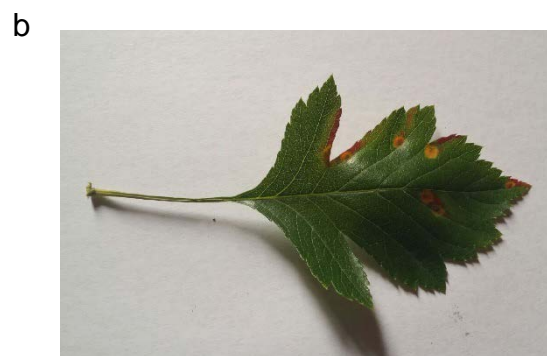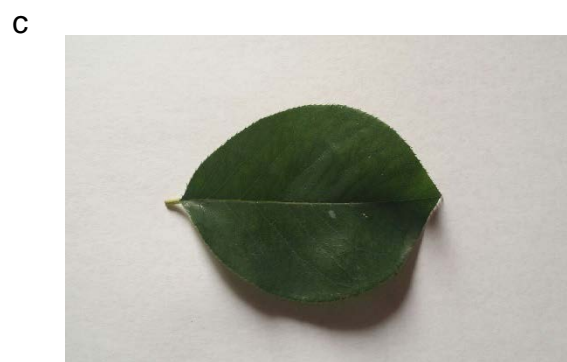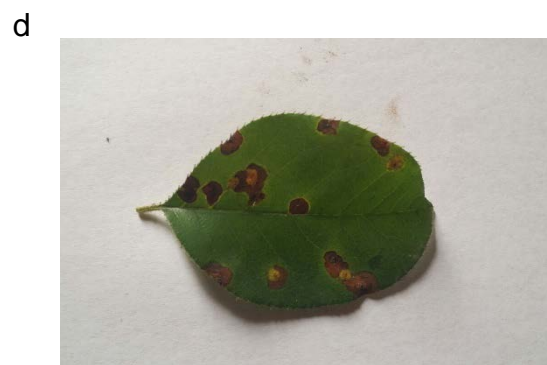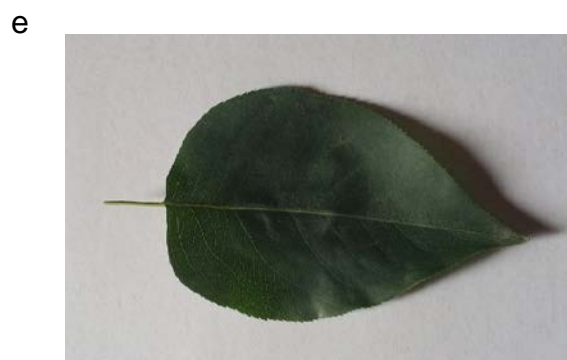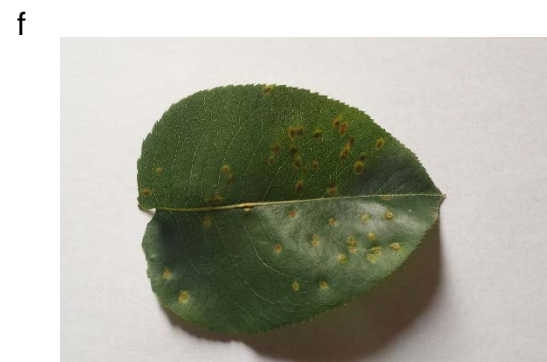

**Supplementary Figure S2.** Four aeciospores and a single peridial cell of *Gymnosporangium asiaticum* on *Pyrus pyrifolia* var. *culta* (Makino) Nakai, specimen HY2926 ( $\times 400$ ).

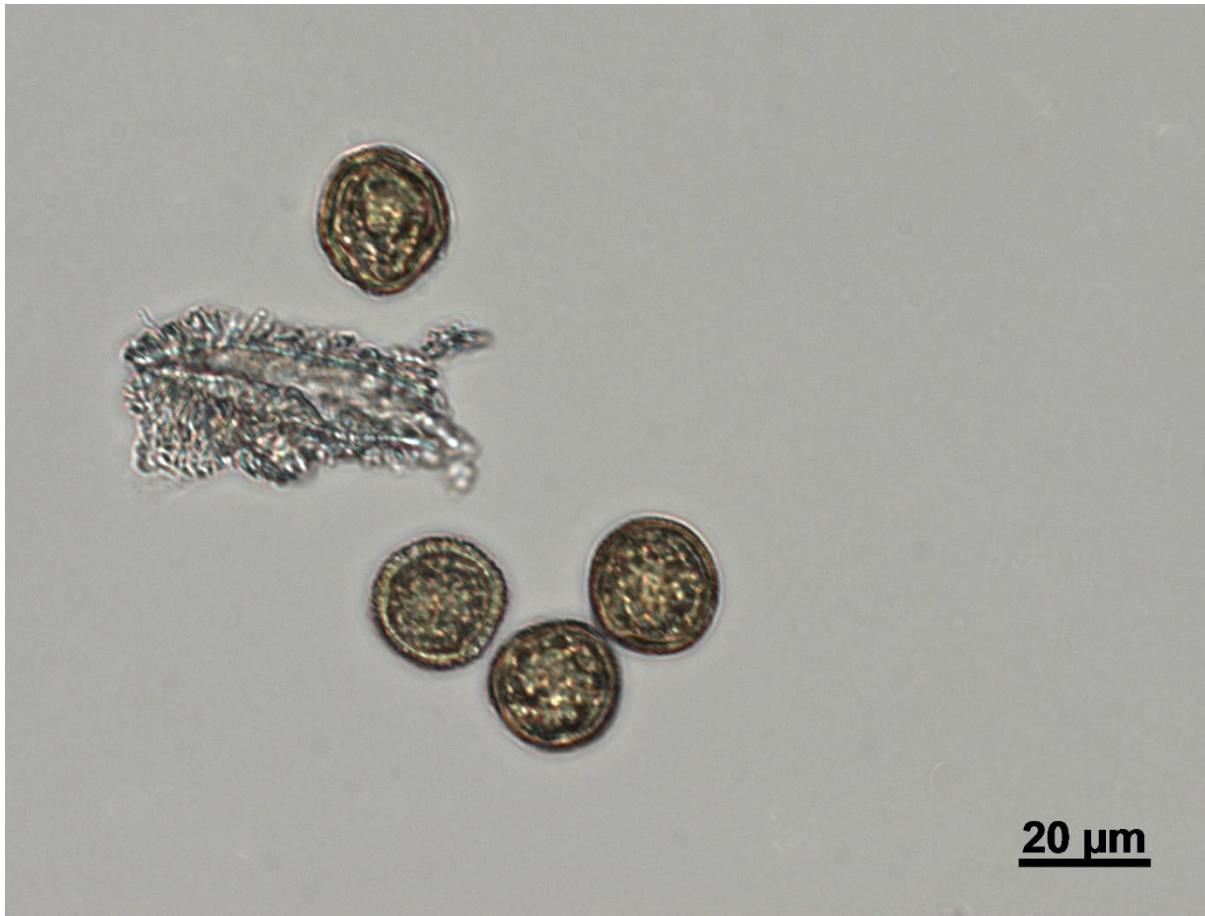

**Supplementary Figure S3.** PCA score scatter plots of *Crataegus pinnatifida* (n=20), *Chaenomeles sinensis* (n=20) and *Pyrus pyrifolia* (n=20) with control (green) and parasitized (red) groups.

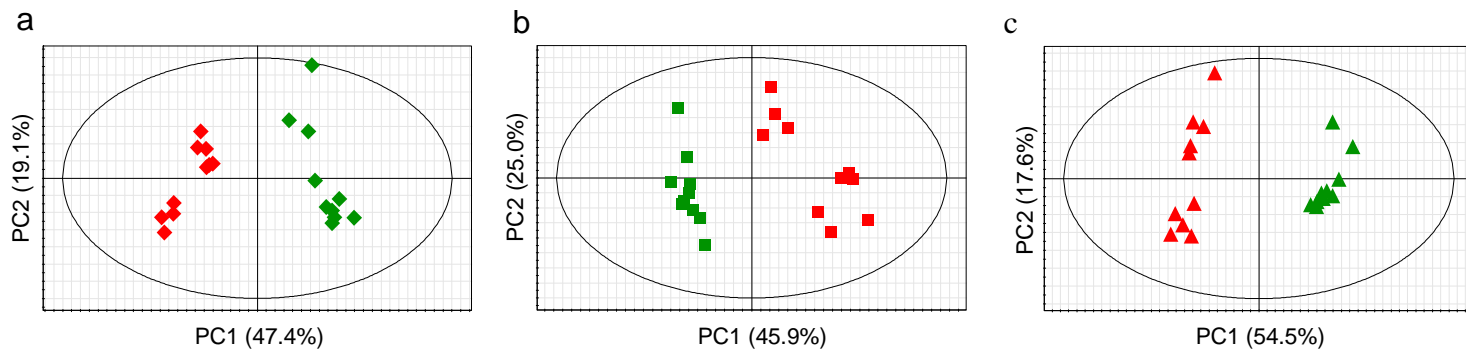

**Supplementary Figure S4.** PCA score scatter plot of control (green) and parasitized (red), including whole samples of Rosaceae species (n=10 for each group, total n=60)

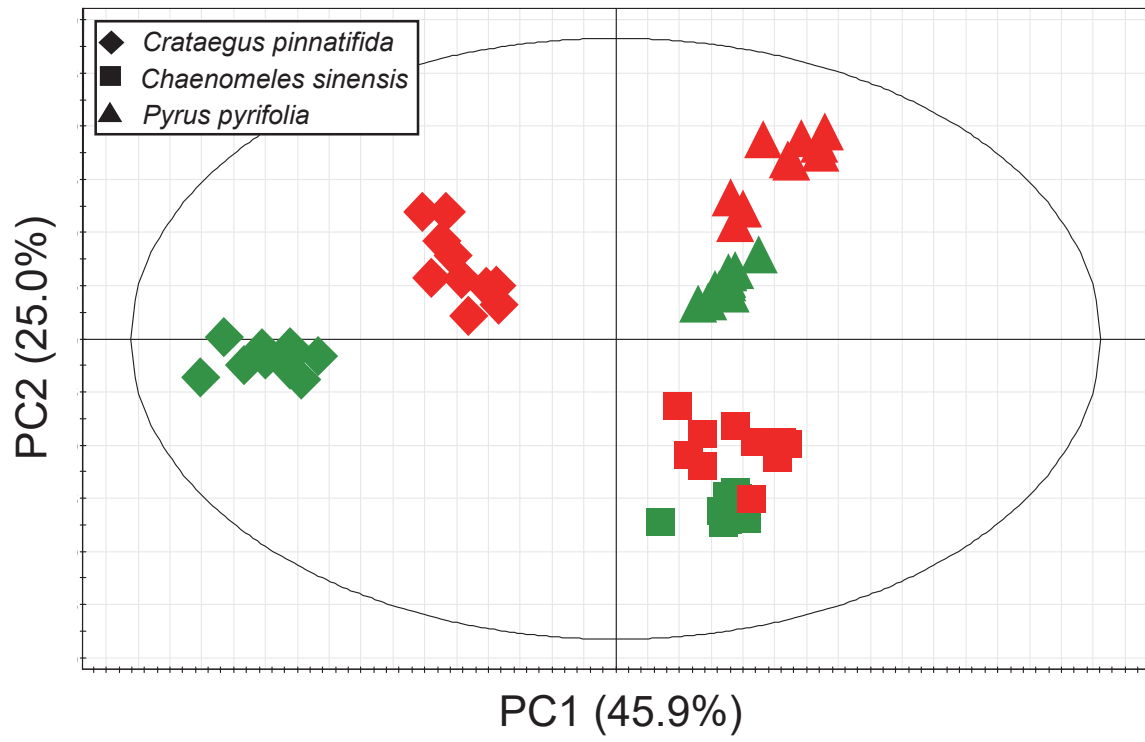

Supplementary Figure S5. Heat-map representation of unsupervised hierarchical clustering analysis (HCA)

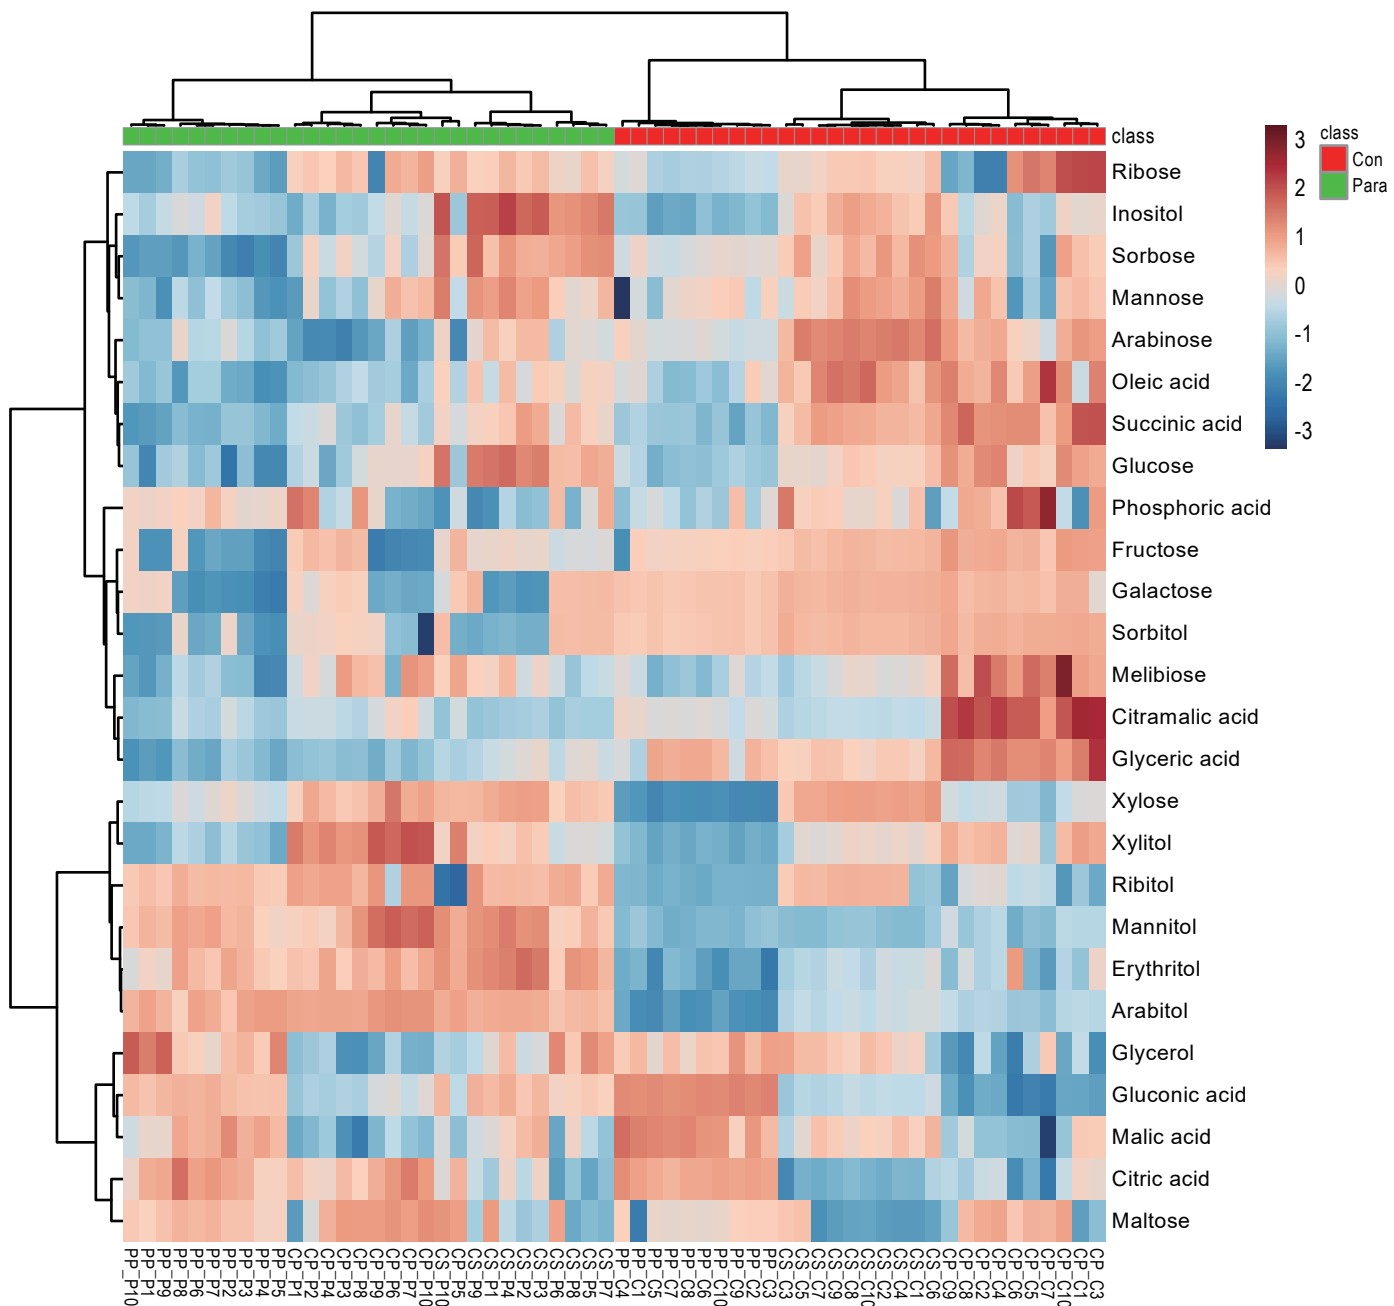

Supplementary Figure S6. Substrates of ANM pathway from other metabolic pathways

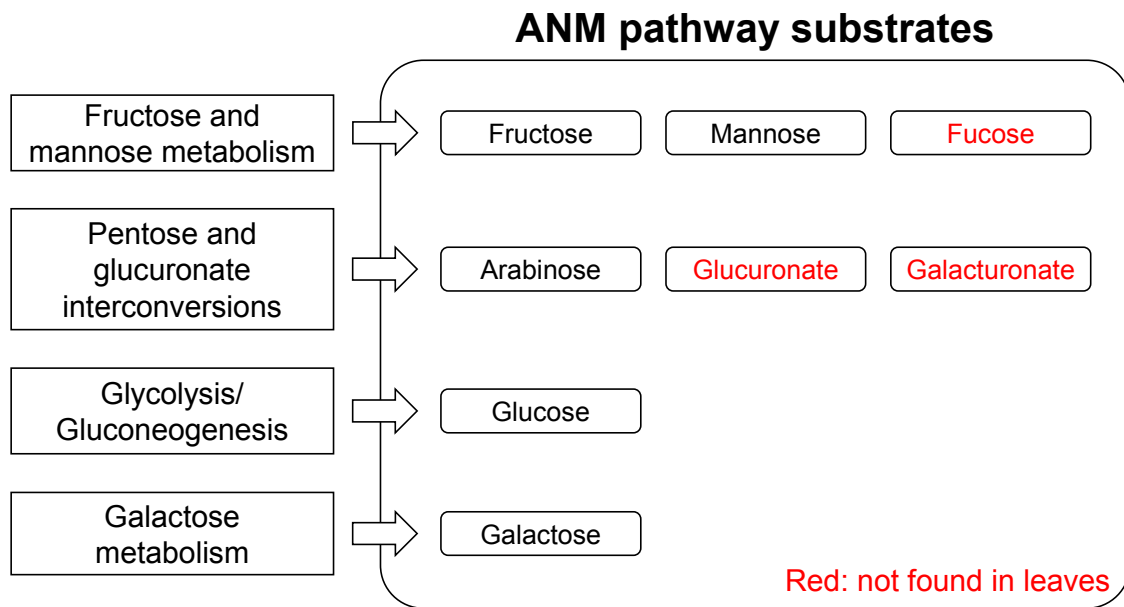

**Supplementary Figure S7.** Mapping of metabolic alterations on GM. Metabolites (p-value <0.05 as asterisk) between control (green) and parasitism (red) were colored based on PPMCC value from -1 (negative correlation, red) to +1 (positive correlation, blue) against fructose (a), glucose (b) and mannose (c). All values in bar graphs were mean + s.d., 30 replicates for each group.

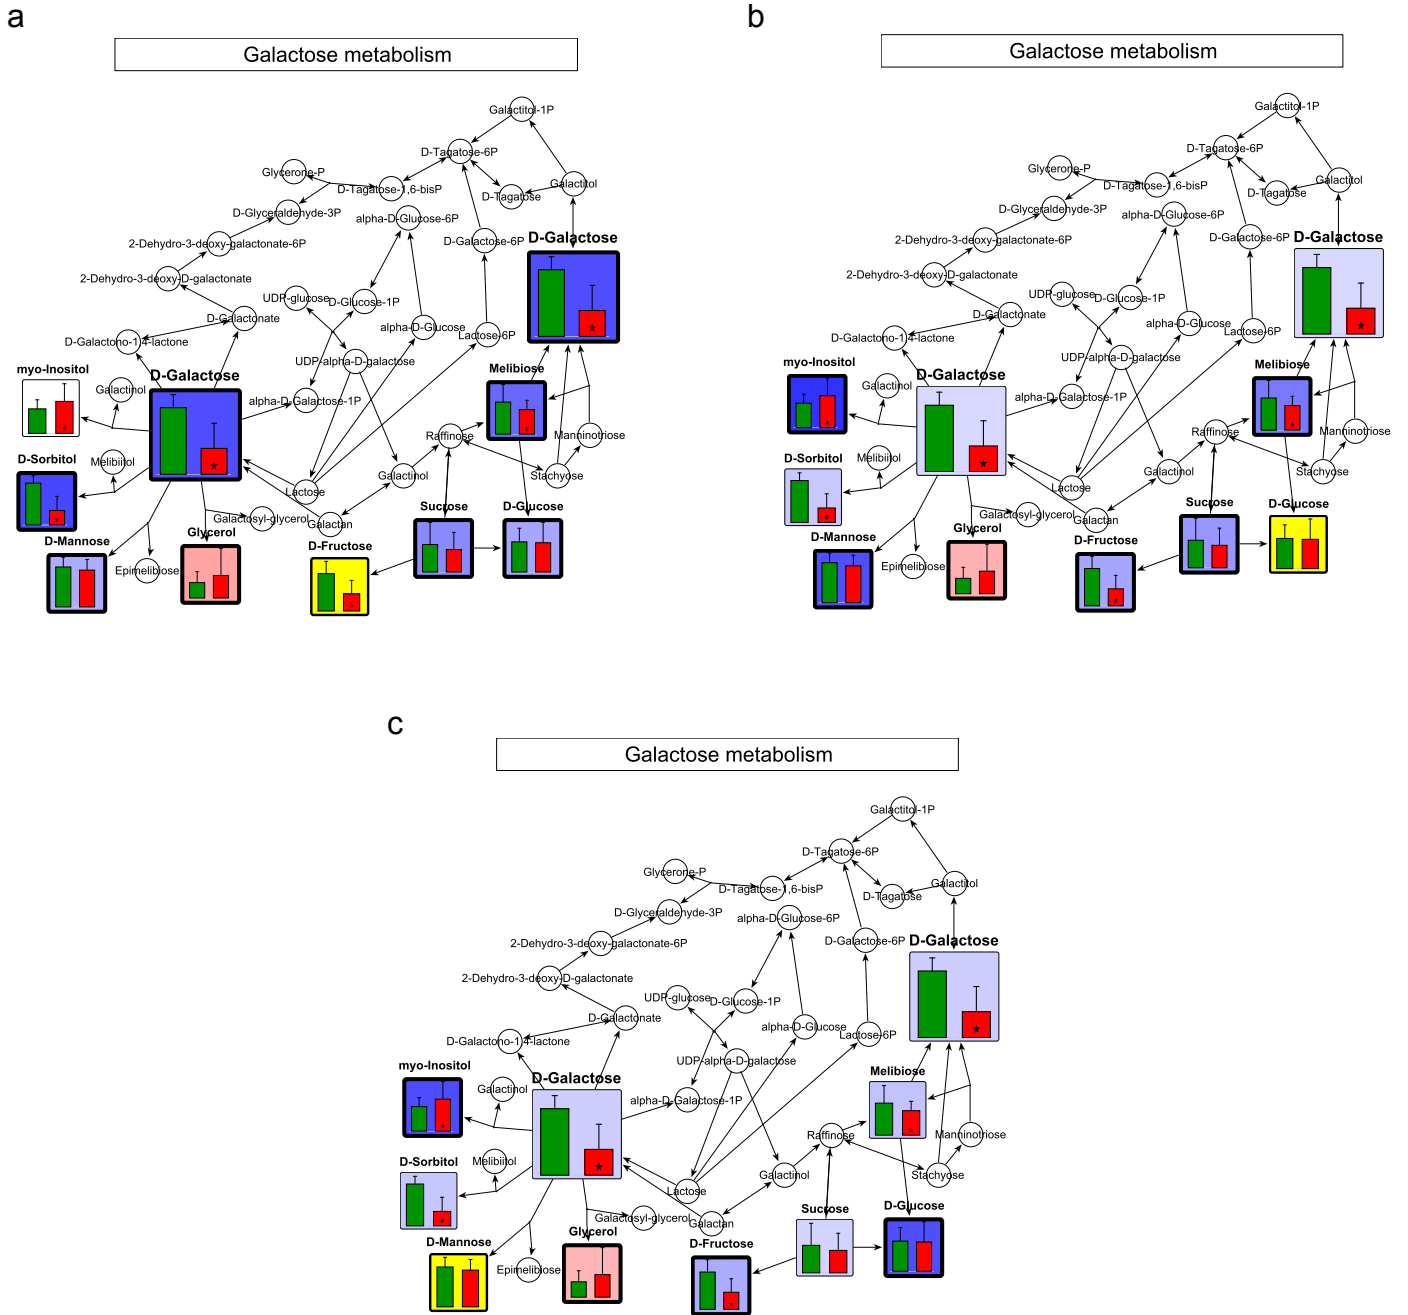



**Supplementary Figure S8.** Correlation analysis (based on PPMCC) results among whole metabolic changes in *Crataegus pinnatifida* (a, n=20), *Chaenomeles sinensis* (b, n=20) and *Pyrus pyrifolia* (c, n=20). Negative correlations (maximum -1, red) and positive correlations (maximum +1, blue) were displayed on heatmaps with clustering.

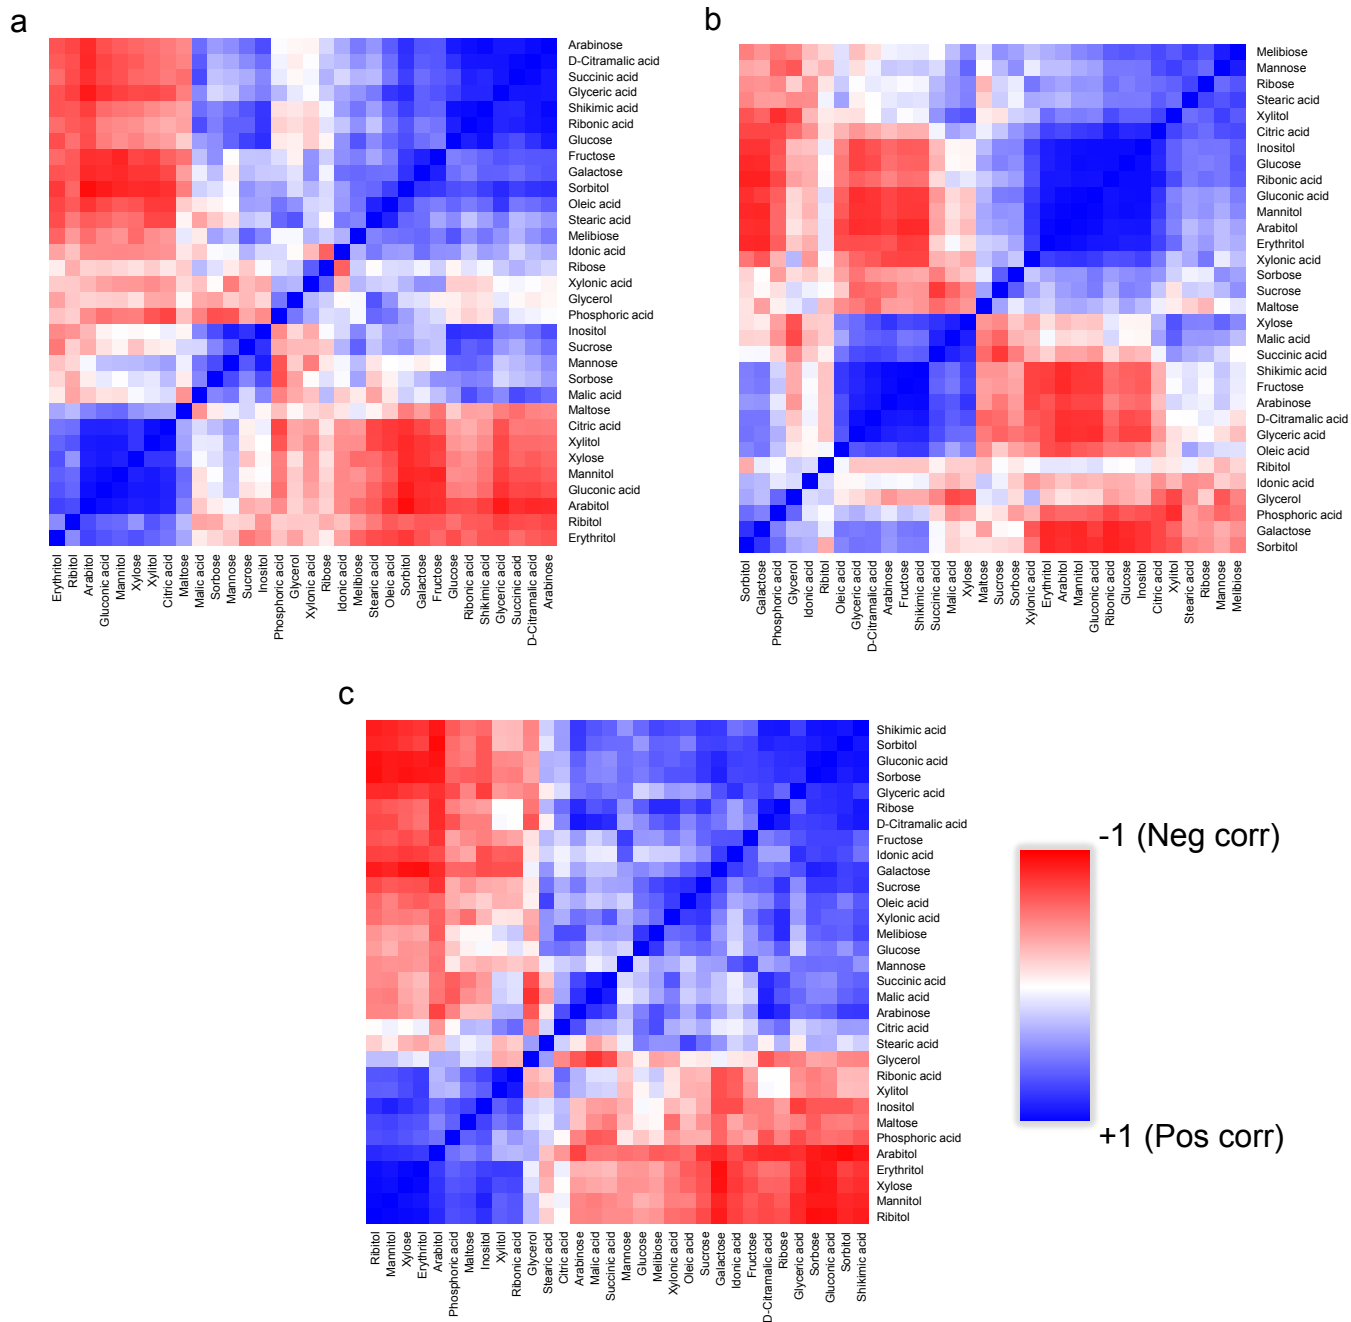

**Supplementary Figure S9. Interaction effect of group variable and accumulated sugar alcohols on the ANM supplies.** Forty-five scatter plots (n = 15 for each species) with min-max normalized values of ANM supplies (fructose, arabinose and galactose on the y-axis) and accumulated sugar alcohols (ribitol, arabitol, erythritol, mannitol and xylitol on the x-axis). The interaction effect directions of the models were measured by the slope differences of two regression lines upon each group variable (control, green; parasitism, red). The significant models were denoted as \*p < 0.05 and \*\*p < 0.01.

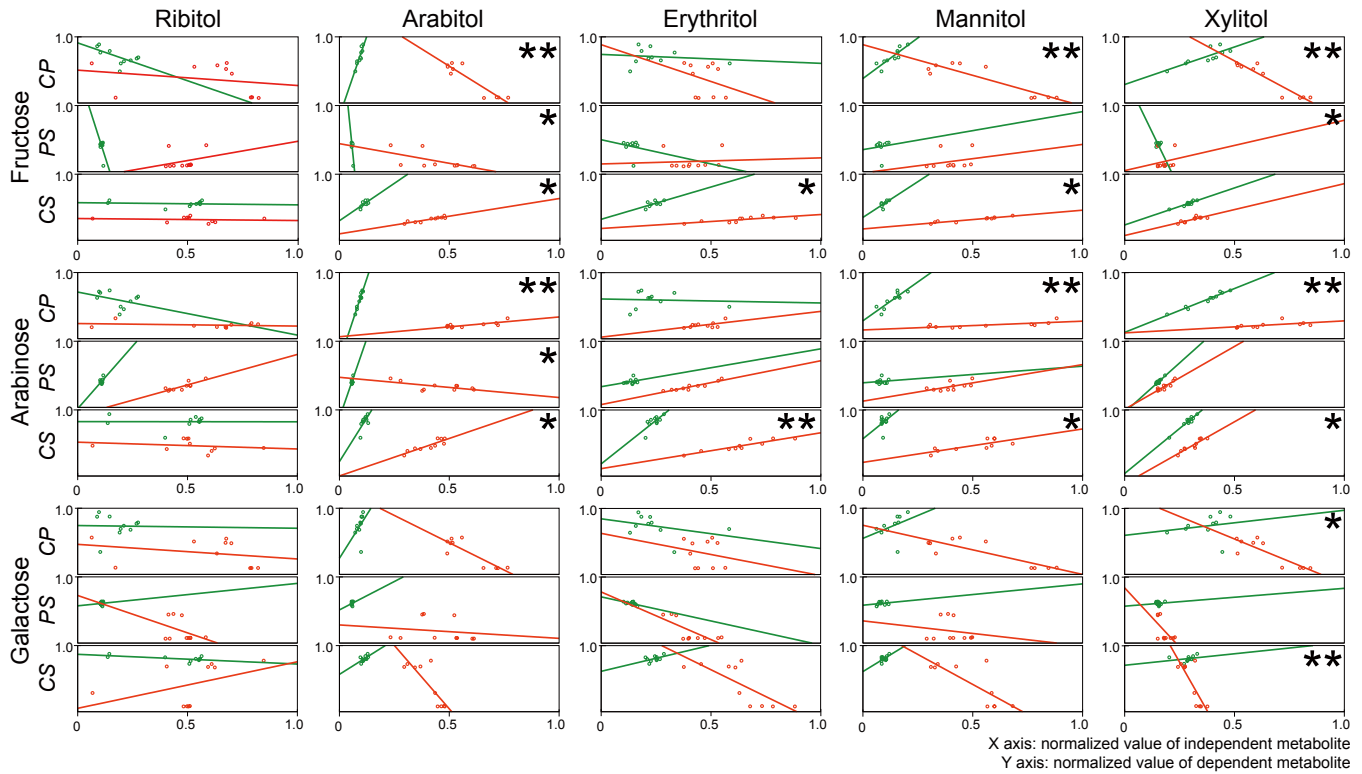

**Supplementary Figure S10. Mass spectra of derivatized metabolites.** The list of metabolites were as follows:

phosphoric acid (a), glycerol (b), succinic acid (c), glyceric acid (d), fumaric acid (e), serine (f), threonine (g), citramalic acid (h), malic acid (i), erythritol (j), aspartic acid (k), erythronic acid (l), 3-hydroxy-3-methylpentanedioic acid (m), xylonic acid (n), xylose (o), arabinose (p), ribose (q), xylitol (r), arabitol (s), ribitol (t), arabinofuranose (u), ribonic acid (v), idonic acid (w), citric acid (x), sorbose (y), mannose (z), fructose (aa), galactose (ab), mannitol (ac), sorbitol (ad), gluconic acid (ae), inositol (af), glucose (ah), linoleic acid (ah), oleic acid (ai), stearic acid (aj), sucrose (ak), maltose (al) and melibiose (am)

(a)

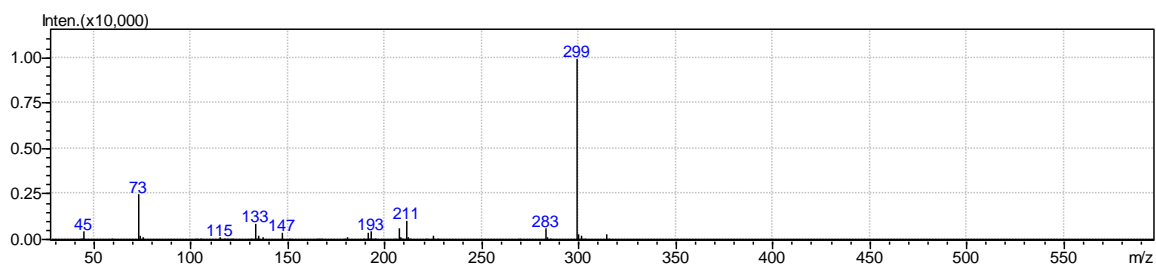

(b)

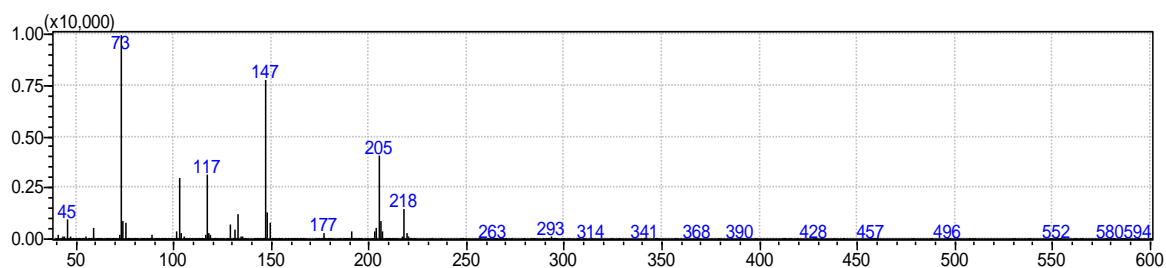

(c)

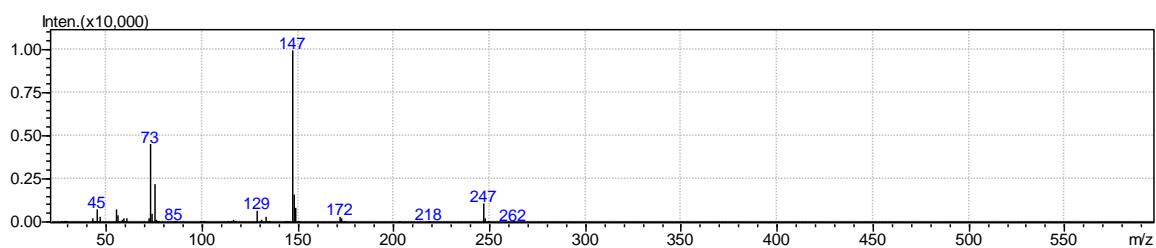

(d)

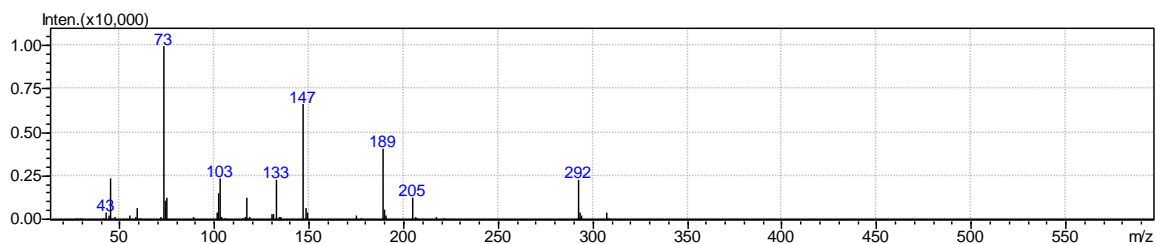

(e)

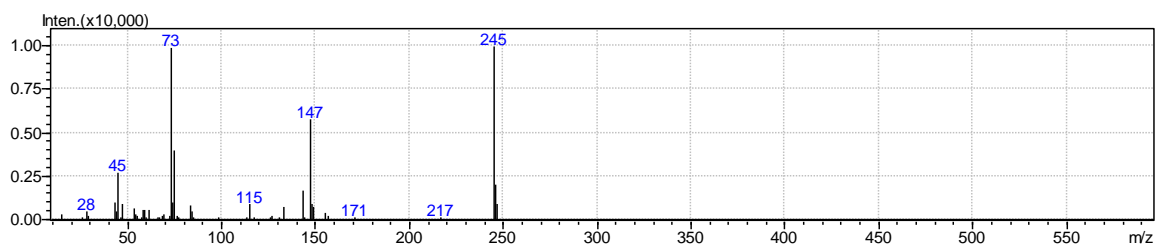

(f)

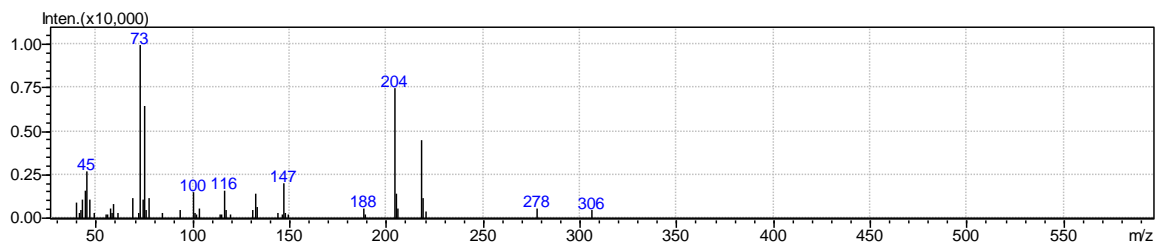

(g)

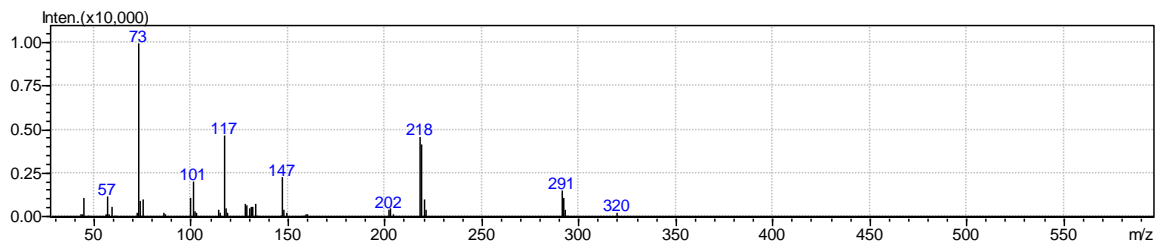

(h)

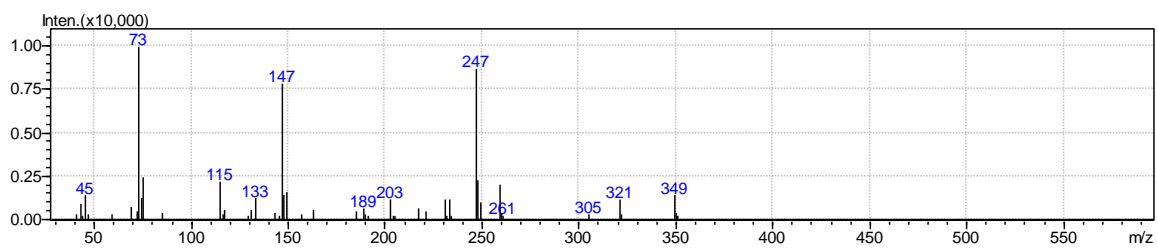

(i)

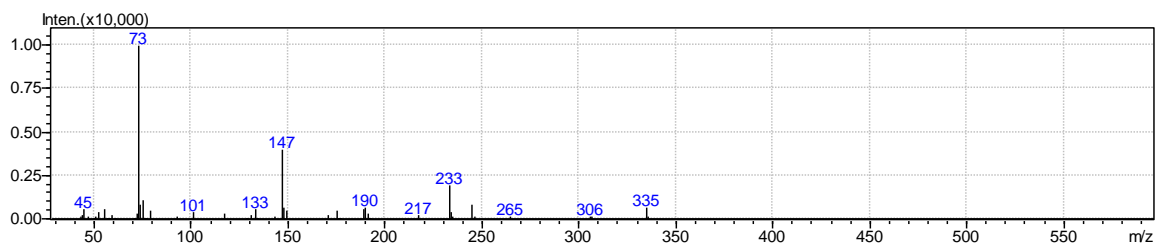

(j)

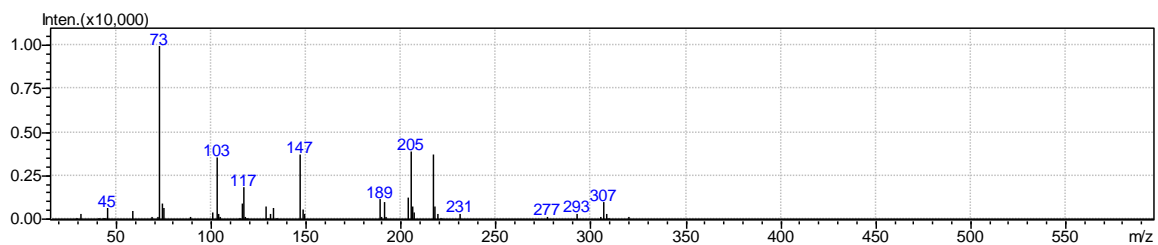

(k)

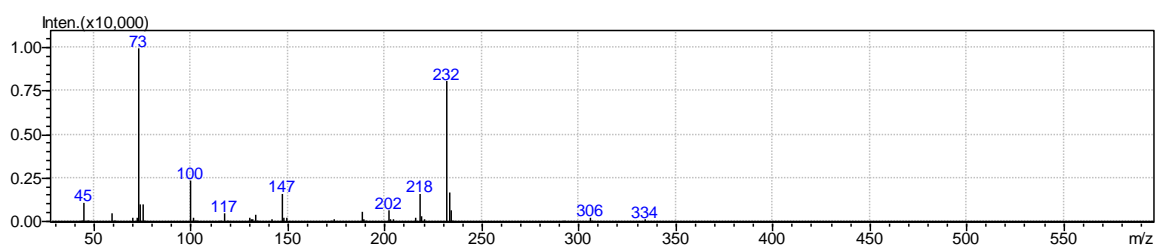

(l)

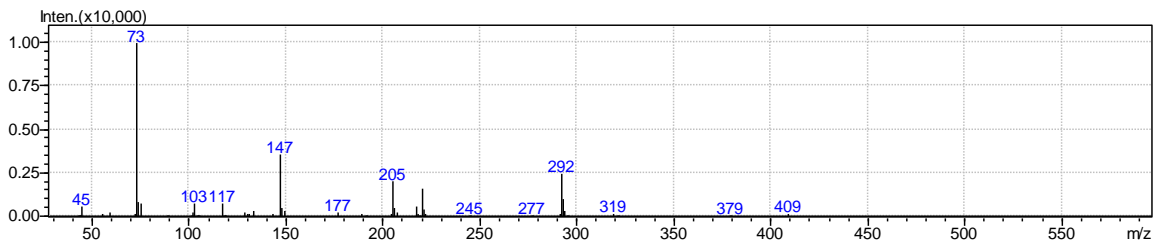

(m)

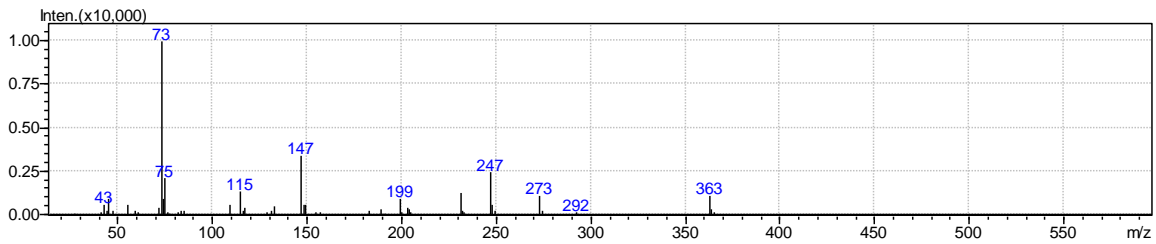

(n)

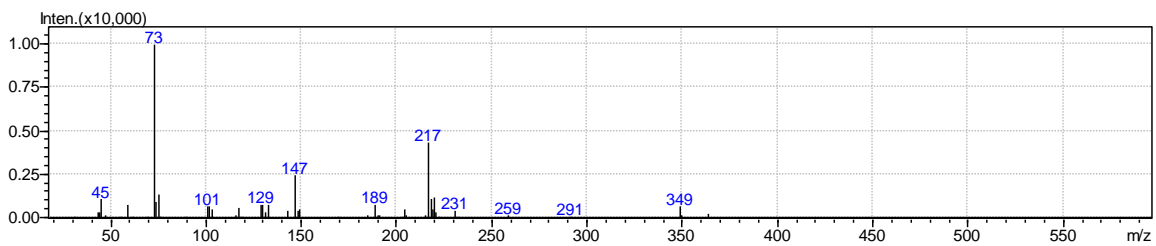

(o)

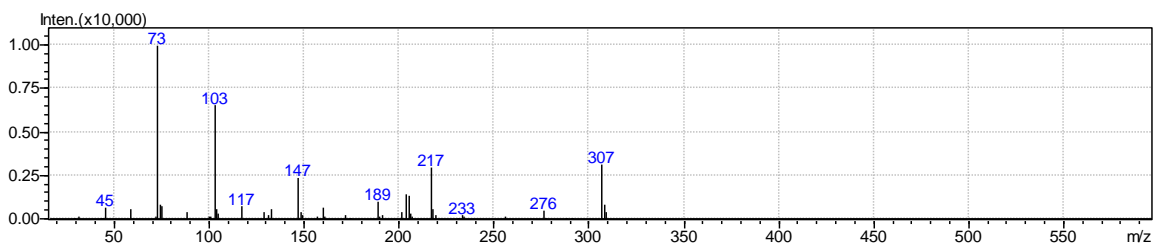

(p)

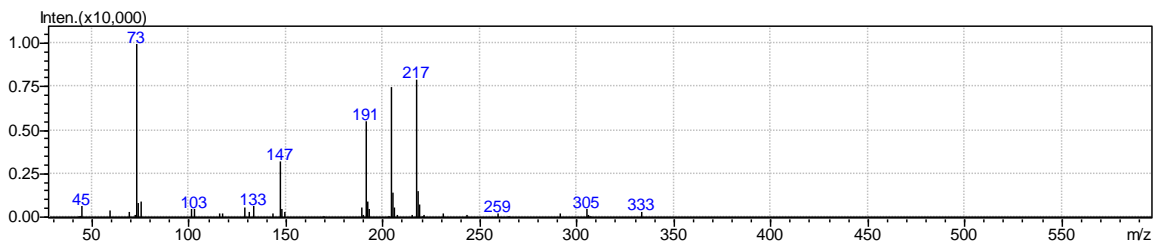

(q)

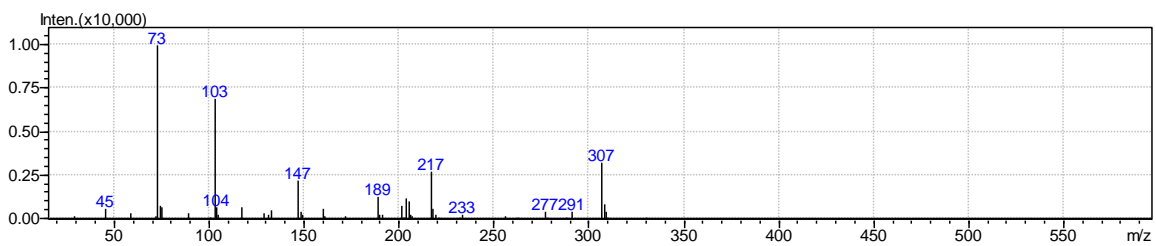

(r)

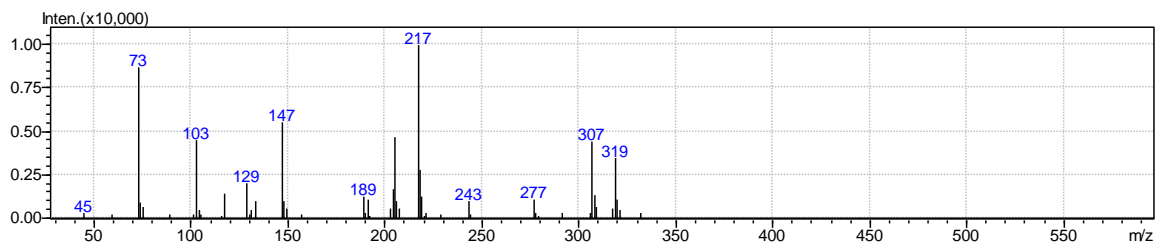

(s)

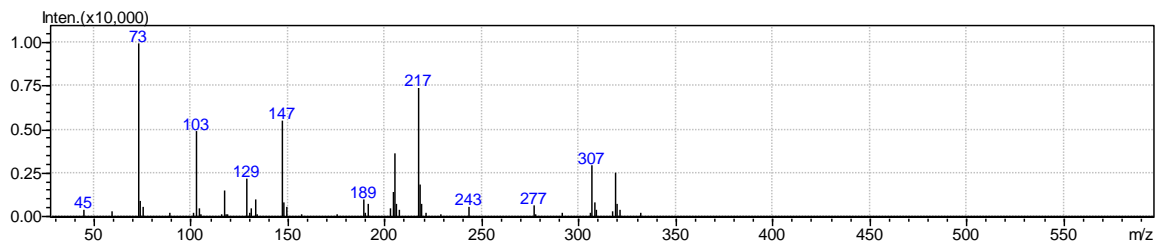

(t)

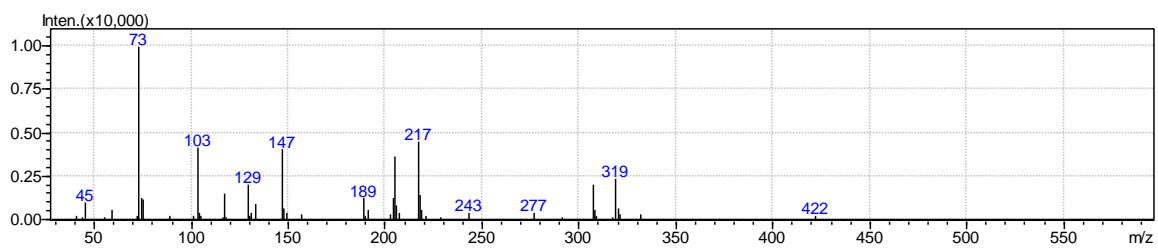

(u)

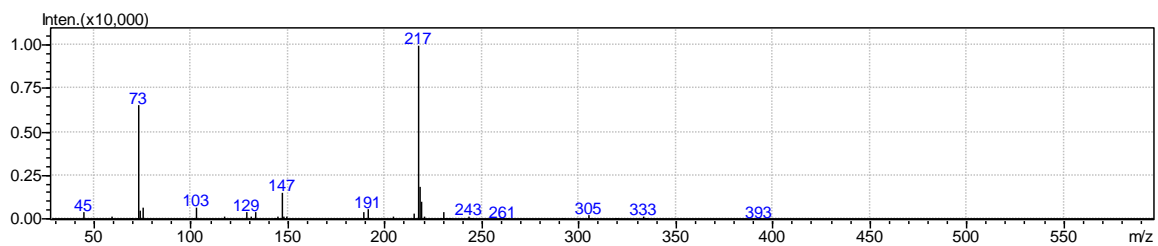

(v)

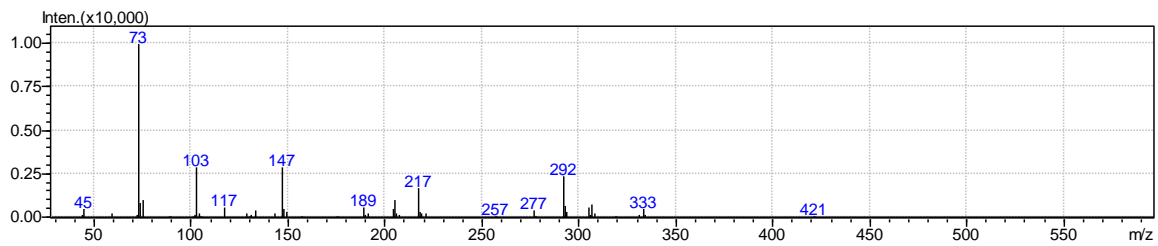

(w)

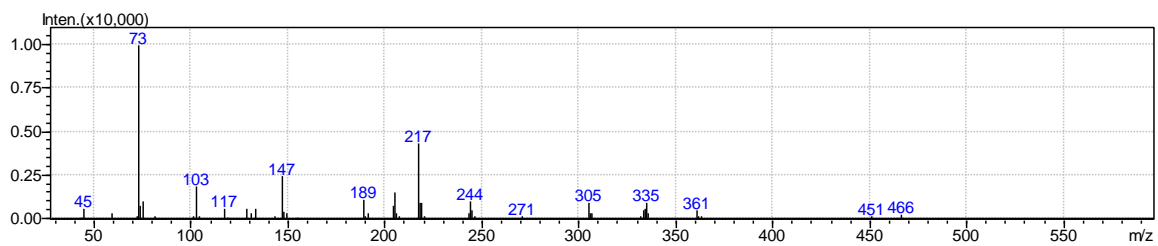

(x)

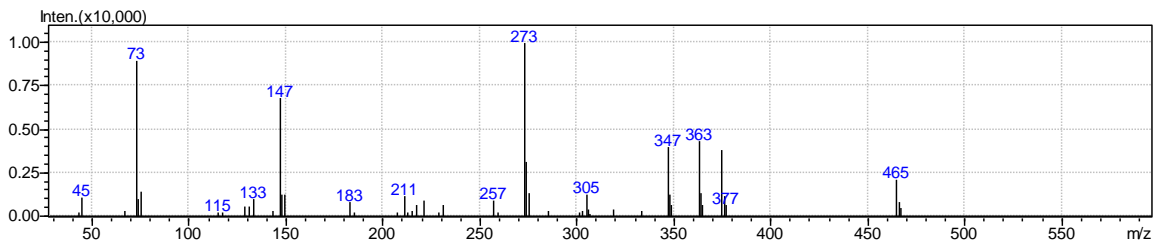

(y)

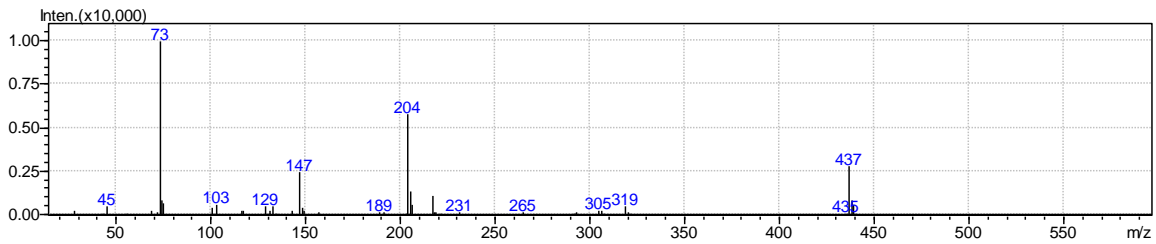

(z)

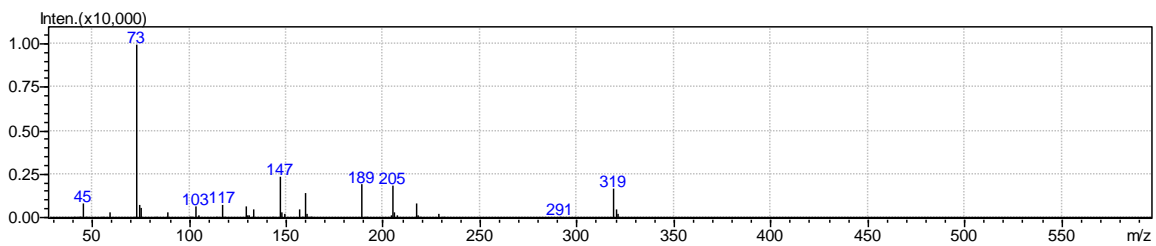

(aa)

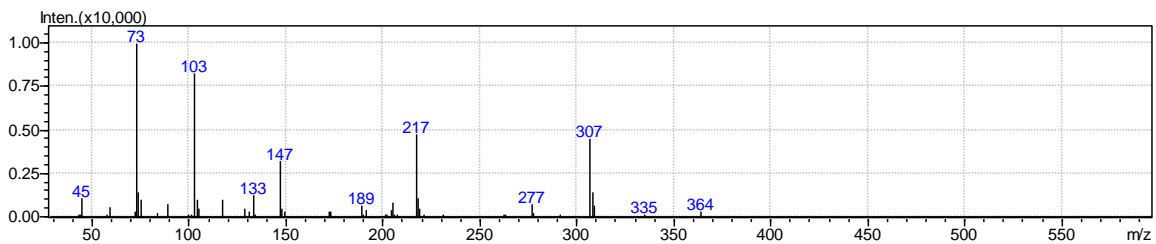

(ab)

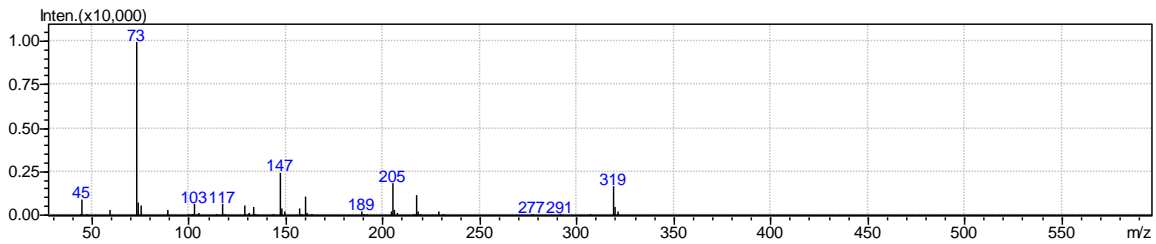

(ac)

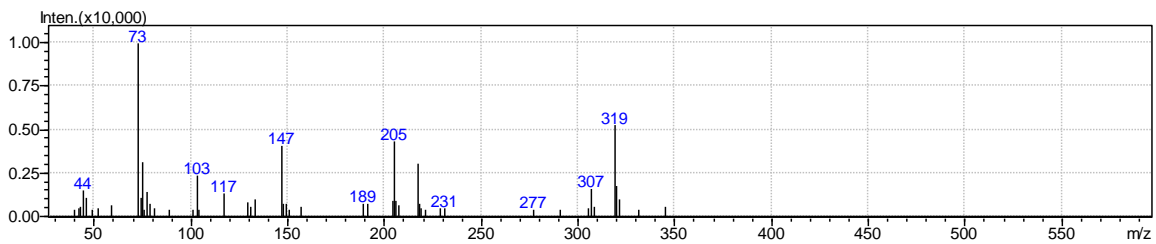

(ad)

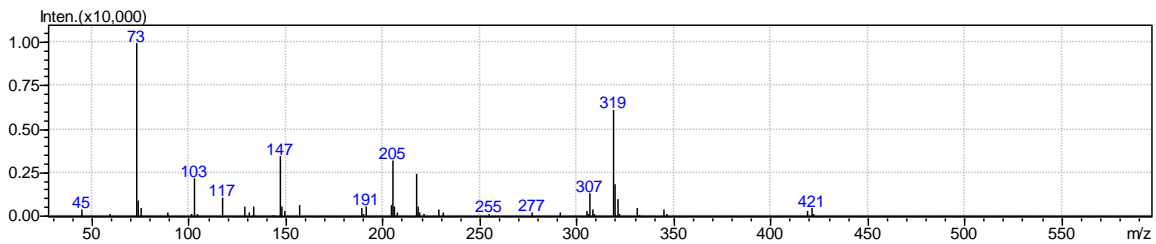

(ae)

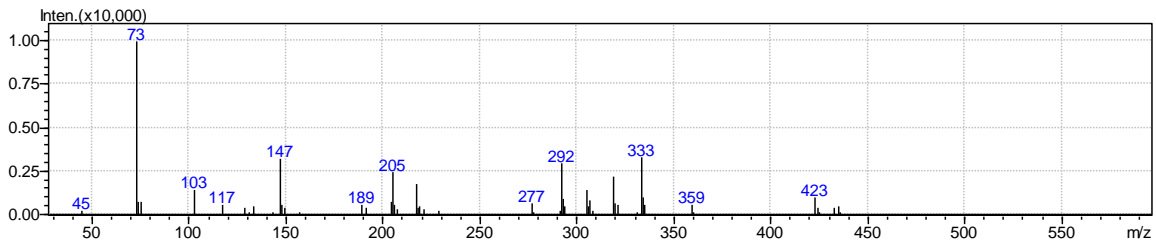

(af)

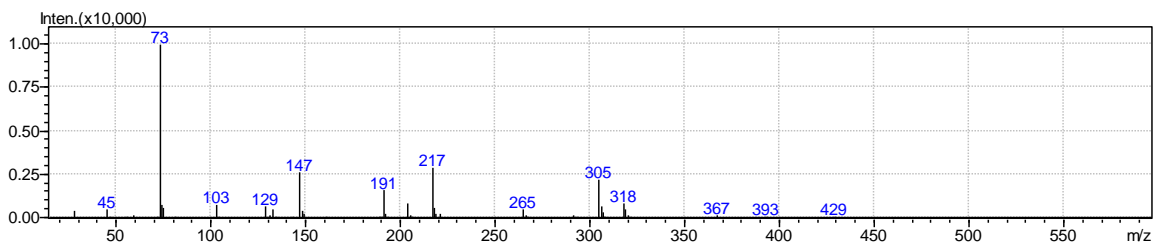

(ag)

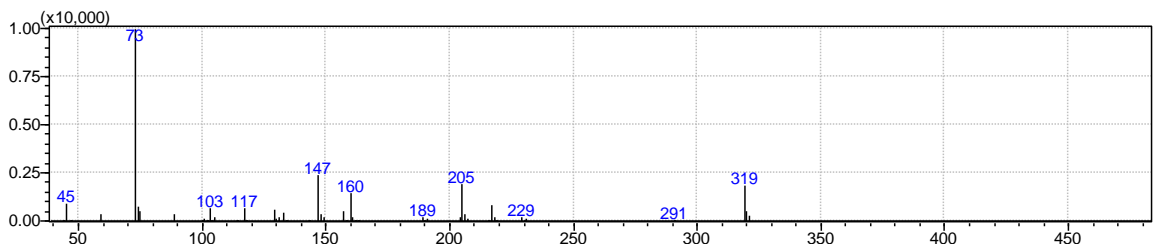

(ah)

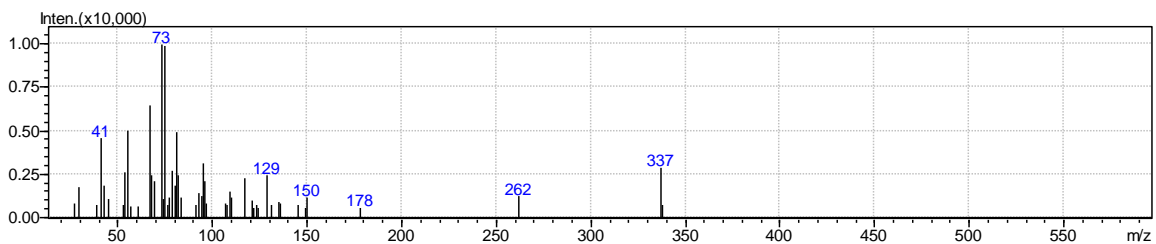

(ai)

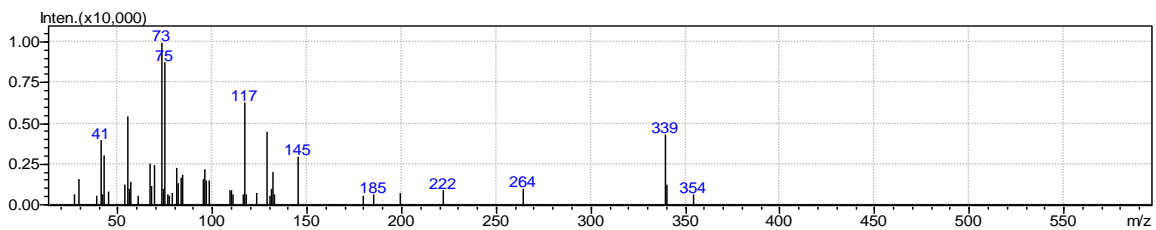

(aj)



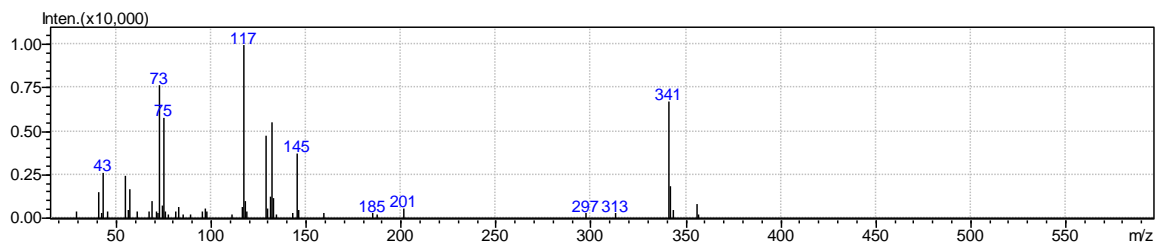

(ak)

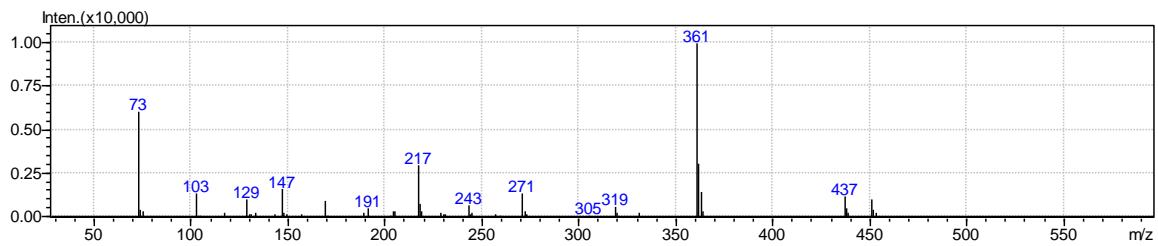

(al)

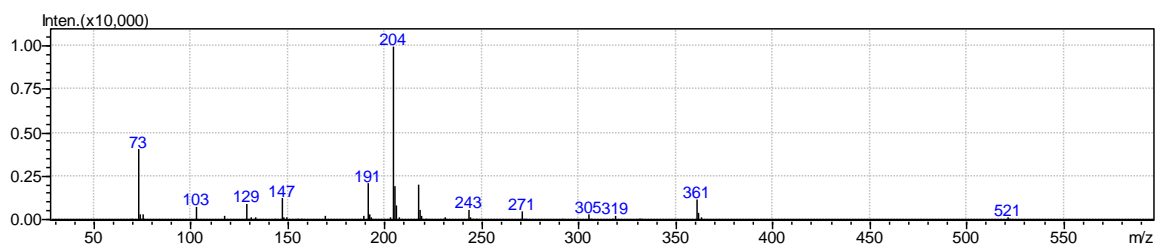

(am)

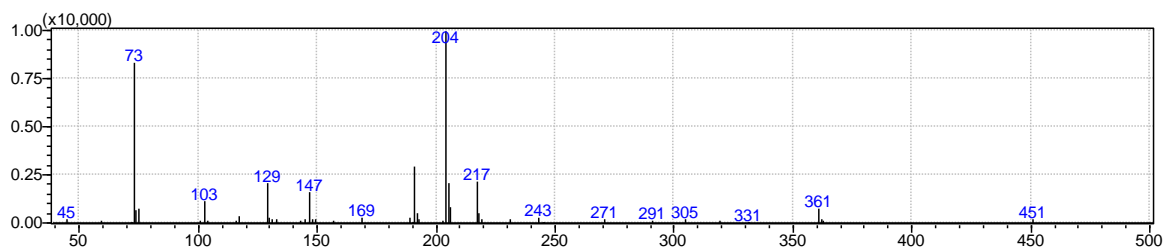

**Supplementary Table S1.** List of identified metabolites and the differences between control and parasitized leaves.

| Retention time (min) | Compound name                    | Fragment ion (derivatized compound) <sup>a</sup> | p-value               | Fold change | Identification NIST | STD |
|----------------------|----------------------------------|--------------------------------------------------|-----------------------|-------------|---------------------|-----|
| 8.04                 | Phosphoric acid, 3TMS            | 298(100), 73(60), 313(18), 45(11)                | 0.13                  | 0.73        | ○                   |     |
| 8.08                 | Glycerol, 3TMS                   | 73(100), 147(78), 205(43), 117(32), 103(31)      | 0.18                  | 1.47        | ○                   | ○   |
| 8.73                 | Succinic acid, 2TMS              | 147(100), 73(52), 75(19), 148(16), 246(10)       | $3.0 \times 10^{-4}$  | 0.54        | ○                   |     |
| 9.25                 | Glyceric acid, 3TMS              | 73(100), 147(61), 189(31), 292(23), 102(17)      | $6.5 \times 10^{-13}$ | 0.53        | ○                   |     |
| 9.41                 | Fumaric acid, 2TMS               | 245(100), 73(57), 147(41), 143(23)               | NM                    |             | ○                   |     |
| 9.84                 | Serine, 3TMS                     | 73(100), 204(95), 217(53), 100(27), 147(20)      | NM                    |             | ○                   |     |
| 10.43                | Threonine, 3TMS                  | 73(100), 117(48), 218(41), 57(22), 147(17)       | NM                    |             | ○                   |     |
| 12.16                | Citramalic acid, 3TMS            | 73(100), 147(53), 247(41), 75(23), 115(15)       | $2.3 \times 10^{-4}$  | 0.33        | ○                   |     |
| 12.47                | Malic acid, 2TMS                 | 73(100), 147(53), 233(18)                        | 0.05                  | 0.87        | ○                   |     |
| 13.04                | Erythritol, 4TMS                 | 73(100), 147(57), 216(51), 103(34), 205(28)      | $1.3 \times 10^{-13}$ | 2.85        | ○                   | ○   |
| 13.10                | Aspartic acid, 3TMS              | 232(100), 73(98), 100(32), 147(22), 218(16)      | NM                    |             | ○                   |     |
| 13.73                | Erythronic acid, 4TMS            | 73(100), 147(51), 292(24), 117(14), 103(11)      | NM                    |             | ○                   |     |
| 14.69                | 3-H-3-MP acid, 3TMS <sup>b</sup> | 73(100), 147(47), 247(31), 115(18), 231(18)      | NM                    |             | ○                   |     |
| 15.27                | Xylonic acid, 3TMS               | 73(100), 217(29), 147(27), 129(18), 102(11)      | 0.93                  | 0.99        | ○                   |     |
| 16.00                | Xylose, 4TMS, 1 MO               | 73(100), 103(77), 217(49), 307(32), 147(28)      | 0.018                 | 1.50        | ○                   |     |
| 16.12                | Arabinose, 4TMS                  | 73(100), 103(88), 217(43), 307(29), 147(25)      | $3.0 \times 10^{-8}$  | 0.50        | ○                   | ○   |
| 16.40                | Ribose, 4TMS, 1 MO               | 73(100), 103(80), 217(44), 307(28), 147(24)      | 0.25                  | 0.88        | ○                   | ○   |
| 17.00                | Xylitol, 5TMS                    | 73(100), 217(64), 103(42), 147(40), 205(21)      | 0.015                 | 1.49        | ○                   | ○   |
| 17.21                | Arabitol, 5TMS                   | 73(100), 217(63), 103(44), 147(41), 205(22)      | $3.9 \times 10^{-23}$ | 11.39       | ○                   | ○   |
| 17.29                | Ribitol, 5TMS                    | 73(100), 217(57), 147(43), 103(40), 205(27)      | $2.5 \times 10^{-7}$  | 2.43        | ○                   | ○   |
| 17.92                | Arabinofuranose, 4TMS            | 217(100), 73(92), 147(31), 232(10)               | NM                    |             | ○                   | ○   |
| 18.01                | Ribonic acid, 5TMS               | 73(100), 292(45), 147(36), 103(30), 217(29)      | 0.64                  | 0.93        | ○                   |     |
| 18.23                | Idonic acid, 4TMS                | 73(100), 147(36), 217(28), 103(24), 436(20)      | $8.2 \times 10^{-4}$  | 0.51        | ○                   |     |
| 18.82                | Citric acid, 4TMS                | 73(100), 273(71), 147(59), 347(17), 375(14)      | 0.017                 | 1.18        | ○                   |     |
| 19.91                | Sorbose, 5TMS                    | 73(100), 103(76), 217(52), 307(32), 147(24)      | 0.17                  | 0.92        | ○                   | ○   |
| 20.09                | Mannose, 5TMS, 1 MO              | 73(100), 319(48), 205(41), 147(39), 160(26)      | 0.24                  | 0.92        | ○                   | ○   |
| 20.37                | Fructose, 5TMS, 1 MO             | 73(100), 103(73), 217(53), 307(33), 147(24)      | $9.0 \times 10^{-8}$  | 0.46        | ○                   | ○   |
| 20.65                | Galactose, 5TMS, 1 MO            | 73(100), 319(49), 205(40), 147(39), 217(21)      | $1.0 \times 10^{-10}$ | 0.39        | ○                   | ○   |
| 20.93                | Mannitol, 6TMS                   | 73(100), 319(56), 147(43), 205(39), 217(35)      | $1.7 \times 10^{-17}$ | 2.86        | ○                   | ○   |
| 21.07                | Sorbitol, 6TMS                   | 73(100), 319(53), 147(42), 205(36), 103(29)      | $3.6 \times 10^{-13}$ | 0.35        | ○                   | ○   |
| 22.10                | Gluconic acid, 6TMS              | 73(100), 147(36), 333(28), 292(25), 103(15)      | 0.79                  | 0.94        | ○                   |     |
| 23.39                | myo-Inositol, 6TMS               | 73(100), 217(60), 305(58), 147(44), 318(31)      | 0.044                 | 1.30        | ○                   | ○   |
| 23.79                | Glucose, 5TMS, 1 MO              | 73(100), 319(63), 205(38), 147(36), 103(21)      | 0.84                  | 0.97        | ○                   | ○   |
| 24.61                | Linoleic acid, 1TMS              | 75(100), 73(97), 67(77), 81(70), 55(54)          | NM                    |             | ○                   |     |
| 24.70                | Oleic acid, 1TMS                 | 73(100), 117(94), 75(90), 129(64), 55(56)        | $1.54 \times 10^{-6}$ | 0.61        | ○                   |     |
| 25.06                | Stearic acid, 1TMS               | 117(100), 73(75), 75(56), 341(55), 132(54)       | 0.061                 | 0.81        | ○                   |     |
| 31.10                | Sucrose, 8TMS                    | 73(100), 361(88), 216(37), 147(25), 103(22)      | 0.32                  | 0.82        | ○                   | ○   |
| 32.84                | Maltose, 8TMS                    | 73(100), 361(86), 204(59), 147(34), 217(31)      | 0.007                 | 1.70        | ○                   | ○   |
| 33.97                | Melibiose, 8TMS                  | 204(100), 73(66), 217(29), 205(28), 361(27)      | 0.041                 | 0.76        | ○                   | ○   |

NIST: putatively identified using NIST database (match score over 80/100)

STD: identified using standard compound

**Supplementary Table S2.** Multivariate (VIP value > 1.00) and univariate (p-value < 0.05) statistical parameters of 26 marker metabolites with whole data (n=60) implying importance for discriminating control and parasitized groups.

| <b>Metabolites</b> | <b>VIP value</b> | <b>p-value</b>        |
|--------------------|------------------|-----------------------|
| Erythritol         | 2.35             | $1.3 \times 10^{-13}$ |
| Arabitol           | 2.34             | $3.9 \times 10^{-23}$ |
| Galactose          | 1.89             | $1.0 \times 10^{-10}$ |
| Citric acid        | 1.65             | 0.017                 |
| Maltose            | 1.50             | 0.007                 |
| myo-Inositol       | 1.47             | 0.044                 |
| Mannitol           | 1.45             | $1.7 \times 10^{-17}$ |
| Arabinose          | 1.40             | $3.0 \times 10^{-8}$  |
| Xylitol            | 1.40             | 0.015                 |
| Malic acid         | 1.39             | 0.05                  |
| Glucose            | 1.37             | 0.84                  |
| Ribitol            | 1.33             | $2.5 \times 10^{-7}$  |
| Glycerol           | 1.28             | 0.18                  |
| Gluconic acid      | 1.26             | 0.79                  |
| Phosphoric acid    | 1.25             | 0.13                  |
| Fructose           | 1.22             | $9.0 \times 10^{-8}$  |
| Mannose            | 1.08             | 0.24                  |
| Ribose             | 1.03             | 0.25                  |
| Sorbitol           | 1.01             | $3.6 \times 10^{-13}$ |
| Sorbose            | 1.00             | 0.17                  |
| Succinic acid      | <1.00            | $3.0 \times 10^{-4}$  |
| Glyceric acid      | <1.00            | $6.5 \times 10^{-13}$ |
| Citramalic acid    | <1.00            | $2.3 \times 10^{-4}$  |
| Oleic acid         | <1.00            | $1.54 \times 10^{-6}$ |
| Melibiose          | <1.00            | 0.041                 |
| Xylose             | <1.00            | 0.018                 |

**Supplementary Table S3.** Metabolic pathway enrichment results.

| Metabolic pathway                                                           | Adjusted p-value       | Total metabolites included | Matched metabolites | Matched/Total (%) |
|-----------------------------------------------------------------------------|------------------------|----------------------------|---------------------|-------------------|
| Pentose and glucuronate interconversions                                    | 2.08×10 <sup>-04</sup> | 53                         | 5                   | 27.8              |
| Galactose metabolism                                                        | 9.06×10 <sup>-04</sup> | 41                         | 4                   | 22.2              |
| Fructose and mannose metabolism                                             | 0.015                  | 48                         | 3                   | 16.7              |
| Starch and sucrose metabolism                                               | 0.015                  | 50                         | 3                   | 16.7              |
| Glyoxylate and dicarboxylate metabolism                                     | 0.015                  | 44                         | 3                   | 16.7              |
| Biosynthesis of plant hormones                                              | 0.026                  | 68                         | 3                   | 16.7              |
| Citrate cycle (TCA cycle)                                                   | 0.026                  | 20                         | 2                   | 11.1              |
| Biosynthesis of alkaloids derived from histidine and purine                 | 0.056                  | 35                         | 2                   | 11.1              |
| Biosynthesis of phenylpropanoids                                            | 0.056                  | 97                         | 3                   | 16.7              |
| Biosynthesis of alkaloids derived from terpenoid and polyketide             | 0.084                  | 48                         | 2                   | 11.1              |
| Ascorbate and aldarate metabolism                                           | 0.084                  | 47                         | 2                   | 11.1              |
| Biosynthesis of alkaloids derived from shikimate pathway                    | 0.102                  | 138                        | 3                   | 16.7              |
| Biosynthesis of alkaloids derived from ornithine, lysine and nicotinic acid | 0.122                  | 67                         | 2                   | 11.1              |
| Amino sugar and nucleotide sugar metabolism                                 | 0.181                  | 87                         | 2                   | 11.1              |
| Biosynthesis of terpenoids and steroids                                     | 0.208                  | 98                         | 2                   | 11.1              |

**Supplementary Table S4.** Enzymatic pathways about metabolic flows from AMN supplies (fructose, arabinose and galactose) to five sugar alcohols. Enzymes were designated as enzyme entry in KEGG pathway and modules. Enzymes and modules in PPP were colored as green.

|           |                |                                                                                                                                                                                                                                                                                                                                                                                                                                                                                                                                                                          |
|-----------|----------------|--------------------------------------------------------------------------------------------------------------------------------------------------------------------------------------------------------------------------------------------------------------------------------------------------------------------------------------------------------------------------------------------------------------------------------------------------------------------------------------------------------------------------------------------------------------------------|
| Fructose  | Ribitol        | $\text{Fructose} \xrightarrow{\text{EC:2.7.1.1}} \text{Fructose-6P} \xrightarrow{\text{M00007}} \text{Ribose-5P} \xrightarrow{\text{EC:2.7.1.15}} \text{Ribose} \xrightarrow{\text{EC:5.3.1.20}} \text{Ribulose} \xrightarrow{\text{EC:1.1.1.56}} \text{Ribitol}$                                                                                                                                                                                                                                                                                                        |
|           | Arabitol       | $\text{Fructose} \xrightarrow{\text{EC:2.7.1.1}} \text{Fructose-6P} \xrightarrow{\text{M00007}} \text{Ribose-5P} \xrightarrow{\text{EC:2.7.1.15}} \text{Ribose} \xrightarrow{\text{EC:5.3.1.20}} \text{Ribulose} \xrightarrow{\text{EC:1.1.1.13}} \text{Arabitol}$<br>$\text{Fructose-6P} \xrightarrow{\text{EC:2.2.1.1}} \text{Xylulose-5P} \xrightarrow{\text{EC:2.7.1.17}} \text{Xylulose} \xrightarrow{\text{EC:1.1.1.287}} \text{Arabinose} \xrightarrow{\text{EC:1.1.1.21}} \text{Arabitol}$<br>$\text{Xylulose} \xrightarrow{\text{EC:1.1.1.11}} \text{Arabitol}$ |
|           | Erythritol     | $\text{Fructose} \xrightarrow{\text{EC:2.7.1.1}} \text{Fructose-6P} \xrightarrow{\text{EC:2.2.1.1}} \text{Erythrose-4P} \xrightarrow{\text{EC:2.7.1.27}} \text{Erythritol}$                                                                                                                                                                                                                                                                                                                                                                                              |
|           | Mannitol       | $\text{Fructose} \xrightarrow{\text{EC:2.7.1.1}} \text{Fructose-6P} \xrightarrow{\text{EC:1.1.1.17}} \text{Mannitol-1P} \xrightarrow{\text{EC:3.1.3.22}} \text{Mannitol}$<br>$\text{Fructose} \xrightarrow{\text{EC:1.1.1.67 or 1.1.1.138}} \text{Mannitol}$                                                                                                                                                                                                                                                                                                             |
|           | Xylitol        | $\text{Fructose} \xrightarrow{\text{EC:2.7.1.1}} \text{Fructose-6P} \xrightarrow{\text{EC:2.2.1.1}} \text{Xylulose-5P} \xrightarrow{\text{EC:2.7.1.17}} \text{Xylulose} \xrightarrow{\text{EC:1.1.1.15}} \text{Xylitol}$<br>$\text{Xylulose} \xrightarrow{\text{EC:1.1.1.10}} \text{Xylitol}$<br>$\text{Xylulose} \xrightarrow{\text{EC:1.1.1.9}} \text{Xylitol}$                                                                                                                                                                                                        |
| Arabinose | Ribitol        | $\text{Arabinose} \xrightarrow{\text{EC:5.3.1.4}} \text{Ribulose} \xrightarrow{\text{EC:1.1.1.56}} \text{Ribitol}$                                                                                                                                                                                                                                                                                                                                                                                                                                                       |
|           | Arabitol       | $\text{Arabinose} \xrightarrow{\text{EC:1.1.1.21}} \text{Arabitol}$                                                                                                                                                                                                                                                                                                                                                                                                                                                                                                      |
|           | Erythritol     | $\text{Arabinose} \xrightarrow{\text{EC:5.3.1.4}} \text{Ribulose} \xrightarrow{\text{EC:5.3.1.20}} \text{Ribose} \xrightarrow{\text{EC:2.7.1.15}} \text{Ribose-5P} \xrightarrow{\text{EC:2.2.1.2}} \text{Erythrose-4P} \xrightarrow{\text{EC:2.2.1.1}} \text{Erythritol}$<br>$\text{Erythrose-4P} \xrightarrow{\text{EC:2.7.1.27}} \text{Erythritol}$                                                                                                                                                                                                                    |
|           | Mannitol       | $\text{Arabinose} \xrightarrow{\text{EC:5.3.1.4}} \text{Ribulose} \xrightarrow{\text{EC:5.3.1.20}} \text{Ribose} \xrightarrow{\text{EC:2.7.1.15}} \text{Ribose-5P} \xrightarrow{\text{M00007}} \text{Fructose-6P} \xrightarrow{\text{EC:1.1.1.17}} \text{Mannitol-1P} \xrightarrow{\text{EC:3.1.3.22}} \text{Mannitol}$                                                                                                                                                                                                                                                  |
|           | Xylitol        | $\text{Arabinose} \xrightarrow{\text{EC:5.3.1.4}} \text{Ribulose} \xrightarrow{\text{EC:5.3.1.20}} \text{Ribose} \xrightarrow{\text{EC:2.7.1.15}} \text{Ribose-5P} \xrightarrow{\text{EC:2.2.1.2}} \text{Xylulose-5P} \xrightarrow{\text{EC:2.2.1.1}} \text{Xylulose} \xrightarrow{\text{EC:1.1.1.15}} \text{Xylitol}$<br>$\text{Xylulose} \xrightarrow{\text{EC:1.1.1.10}} \text{Xylitol}$<br>$\text{Xylulose} \xrightarrow{\text{EC:1.1.1.9}} \text{Xylitol}$                                                                                                          |
| Galactose | Leloir pathway | $\text{Galactose} \xrightarrow{\text{EC:2.7.1.6}} \text{Galactose-1P} \xrightarrow{\text{EC:2.7.7.12}} \text{Glucose-1P} \xrightarrow{\text{EC:5.4.2.5}} \text{Glucose-6P}$<br>$\text{Glucose-1P} \xrightarrow{\text{EC:5.4.2.2}} \text{Glucose-6P}$                                                                                                                                                                                                                                                                                                                     |
|           | Ribitol        | $\text{Galactose} \xrightarrow{\text{Leloir pathway}} \text{Glucose-6P} \xrightarrow{\text{M00006}} \text{Ribulose-5P} \xrightarrow{\text{EC:2.7.1.16}} \text{Ribulose} \xrightarrow{\text{EC:1.1.1.56}} \text{Ribitol}$                                                                                                                                                                                                                                                                                                                                                 |
|           | Arabitol       | $\text{Galactose} \xrightarrow{\text{Leloir pathway}} \text{Glucose-6P} \xrightarrow{\text{M00006}} \text{Ribulose-5P} \xrightarrow{\text{EC:2.7.1.16}} \text{Ribulose} \xrightarrow{\text{EC:1.1.1.13}} \text{Arabitol}$                                                                                                                                                                                                                                                                                                                                                |
|           | Erythritol     | $\text{Galactose} \xrightarrow{\text{Leloir pathway}} \text{Glucose-6P} \xrightarrow{\text{EC:5.3.1.9}} \text{Fructose-6P} \xrightarrow{\text{EC:2.2.1.1}} \text{Erythrose-4P} \xrightarrow{\text{EC:2.7.1.27}} \text{Erythritol}$                                                                                                                                                                                                                                                                                                                                       |
|           | Mannitol       | $\text{Galactose} \xrightarrow{\text{Leloir pathway}} \text{Glucose-6P} \xrightarrow{\text{EC:5.3.1.9}} \text{Fructose-6P} \xrightarrow{\text{EC:1.1.1.17}} \text{Mannitol-1P} \xrightarrow{\text{EC:3.1.3.22}} \text{Mannitol}$                                                                                                                                                                                                                                                                                                                                         |
|           | Xylitol        | $\text{Galactose} \xrightarrow{\text{Leloir pathway}} \text{Glucose-6P} \xrightarrow{\text{M00006}} \text{Ribulose-5P} \xrightarrow{\text{EC:5.1.3.1}} \text{Xylulose-5P} \xrightarrow{\text{EC:2.7.1.17}} \text{Xylulose} \xrightarrow{\text{EC:1.1.1.15}} \text{Xylitol}$<br>$\text{Xylulose} \xrightarrow{\text{EC:1.1.1.10}} \text{Xylitol}$<br>$\text{Xylulose} \xrightarrow{\text{EC:1.1.1.9}} \text{Xylitol}$                                                                                                                                                     |
